# Supplementary material
Source: publisher figshare collection journal article supplement (https://sage.figshare.com/ndownloader/files/37570195)
Supplement: Supplementary file 1 [file 37570195]

**Supplementary Table 1** Composition of AlSi10Mg alloy powder（wt.%）

| Element | Si | Fe | Mg | Mn | Ti | O | Al |
| --- | --- | --- | --- | --- | --- | --- | --- |
| Content | 10.23 | 0.17 | 0.41 | 0.013 | 0.044 | 0.045 | Bal. |





**Supplementary Figure 1** SEM image of AlSi10Mg powder

**Supplementary Table 2** Process parameters of different scanning strategies

|  | | Laser Power  (W) | Scanning Spacing  (mm) | Scanning Speed  (mm·s-1) | Powder Thickness  (μm) |
| --- | --- | --- | --- | --- | --- |
| First Scan | | 300 | 0.12 | 1600 | 30 |
| Rescan | A1 | No Rescan |
| A2&A3 | 240 |
| A2&A3 | 270 |
| A2&A3 | 300 |
| A2&A3 | 330 |
| A2&A3 | 360 |


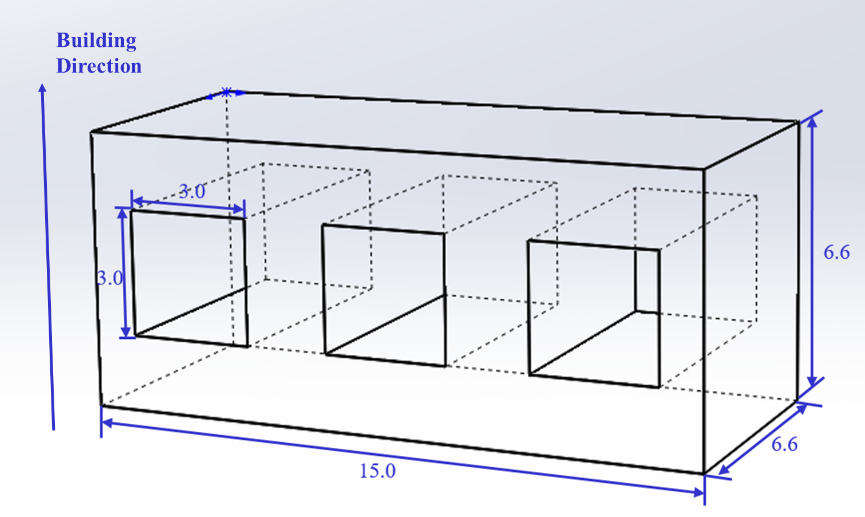


**Supplementary Figure 2** The design sketch of the printed AlSi10Mg parts
